# 1 Graphical Abstract

## 2 Phenotypic Plasticity Drives Seasonal Thermal Tolerance in a Baltic Copepod

3 Alexandra Hahn, Reid S. Brennan

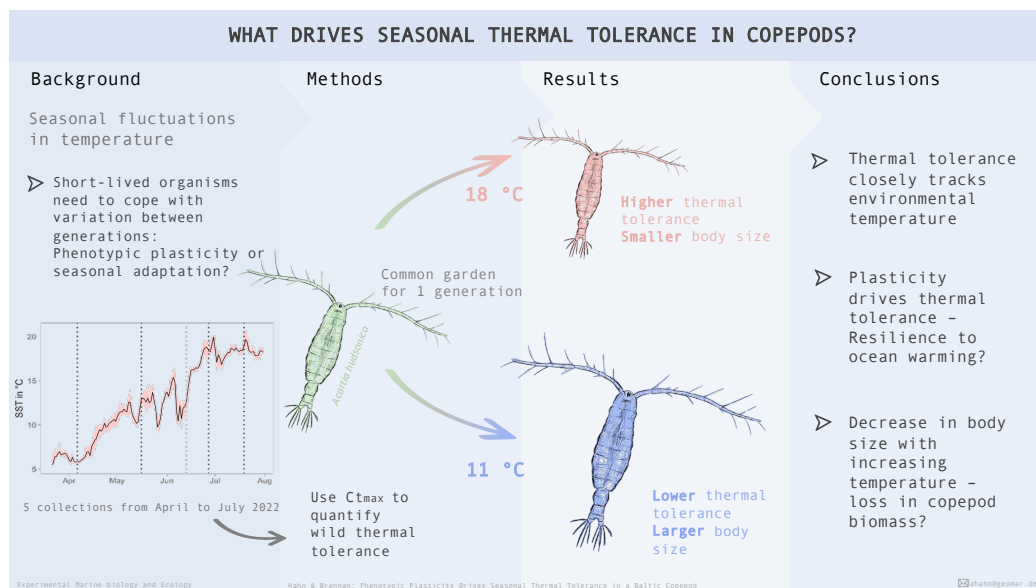

## 5 Highlights

### 6 **Phenotypic Plasticity Drives Seasonal Thermal Tolerance in a Baltic** 7 **Copepod**

8 Alexandra Hahn, Reid S. Brennan

- 9     • *Acartia hudsonica* shows strong seasonality in thermal tolerance.
- 10    • The observed seasonal differences in  $CT_{max}$  are driven by phenotypic  
11      plasticity not adaptation.
- 12    • Body size in *A. hudsonica* is negatively correlated to environmental  
13      and developmental temperature.
- 14    • This is the first record of *A. hudsonica* in the Baltic Sea known to the  
15      authors.

16 Phenotypic Plasticity Drives Seasonal Thermal  
17 Tolerance in a Baltic Copepod

18 Alexandra Hahn<sup>a,b</sup>, Reid S. Brennan<sup>a,b</sup>

<sup>a</sup>*Marine Evolutionary Ecology, GEOMAR Helmholtz Center for Ocean Research  
Kiel, Düsternbrooker Weg 20, Kiel, 24105, Germany*

<sup>b</sup>*Corresponding author; AH: ahahn@geomar.de RB: rbrennan@geomar.de*

---

19 **Abstract**

20 Seasonal changes in environmental conditions require substantial physiologi-  
21 cal responses for population persistence. Phenotypic plasticity is a common  
22 mechanism to tolerate these changes, but for organisms with short gener-  
23 ation times rapid adaptation may also be a contributing factor. Here, we  
24 aimed to disentangle the impacts of adaptation from phenotypic plasticity  
25 on thermal tolerance of the calanoid copepod *Acartia hudsonica* collected  
26 throughout spring and summer of a single year. We used a common garden  
27 (11 °C and 18 °C) design to determine the relative impacts of plasticity ver-  
28 sus adaptation. *Acartia hudsonica* were collected from five time points across  
29 the season and thermal tolerance was determined using critical thermal max-  
30 imum (CT<sub>max</sub>) followed by additional measurements after one generation of  
31 common garden. As sea surface temperature increased through the season,  
32 field collected individuals showed corresponding increases in thermal toler-  
33 ance but decreases in body size. Despite different thermal tolerances of wild  
34 collections, common garden animals did not differ in CT<sub>max</sub> within thermal  
35 treatments. Instead, there was evidence of phenotypic plasticity where higher  
36 temperatures were tolerated by the 18 °C versus the 11 °C treatment animals

37 across all collections. Acclimation also had significant effects on body size,  
38 with higher temperatures resulting in smaller individuals, consistent with  
39 the temperature size rule. Therefore, the differences in thermal tolerance  
40 and body size observed in field collected *A. hudsonica* were likely driven by  
41 plasticity rather than adaptation. However, the observed decrease in body  
42 size suggests that nutrient availability and ecosystem functioning could be  
43 impacted if temperatures consistently increase with no change in copepod  
44 abundance. This is the first record of *A. hudsonica* in the Baltic Sea known  
45 to the authors.

46 *Keywords:*  $CT_{max}$ , Seasonality, *Acartia*

---

## 47 1. Introduction

48 Environmental variation is ubiquitous across habitats and organisms are  
49 able to respond to and tolerate this variation in multiple ways. When vari-  
50 ation is both predictable and experienced within the lifespan of an individ-  
51 ual, it is expected that plasticity will evolve (Pereira et al., 2017; Bitter  
52 et al., 2021). Conversely, if environmental variation is unpredictable or at  
53 timescales longer than generation time, plasticity is unlikely to evolve but  
54 selection should act with each environmental fluctuation. In this latter case,  
55 the resulting changes in selective pressure through time can lead to fluctuat-  
56 ing selection, which can not only drive rapid adaptation but also contribute  
57 to the maintenance of genetic diversity in populations (Bergland et al., 2014).

58 One of the major drivers of fluctuating selection in the wild is seasonal  
59 change. In this scenario, the environmental changes that occur within a  
60 year result in divergent selective pressures at different temporal periods. For

61 example, summer months may favor warm tolerant genotypes while cooler  
62 spring or fall temperatures may favor genotypes that have higher perfor-  
63 mance at low temperature. While these changes are relatively consistent  
64 on a yearly basis, the temporal scale is beyond many organisms' lifespan,  
65 which can lead to adaptation to different periods within the fluctuating sea-  
66 sonal environmental change. This phenomenon has been observed in diverse  
67 species and ecosystems, including marine copepods (Hairston and Dillon,  
68 1990), *Lonchopterid* flies (Niklasson et al., 2004), dandelion (Vavrek et al.,  
69 1996), two-spotted ladybugs (Brakefield, 1985), and swallows (Brown et al.,  
70 2013), among others (Siepielski et al., 2009; Bell, 2010). There is also evi-  
71 dence for fluctuating selection at the genomic level: in *Drosophila* fruit flies  
72 genome-wide allele frequencies consistently and repeatedly shift between sea-  
73 sons due to selection, helping to maintain genetic variation within popula-  
74 tions (Johnson et al., 2023). Thus, adaptive responses to seasonal change  
75 may be a common phenomenon across taxa with short generation times.

76 In addition to contributing to the maintenance of genetic variation within  
77 populations, the mechanisms underlying rapid seasonal adaptation can help  
78 shed light on how populations may respond to ongoing anthropogenic driven  
79 global change. For example, many species experience yearly temperature  
80 changes with an amplitude greater than those predicted under global warm-  
81 ing (Bujan et al., 2020) and across terrestrial and aquatic ectotherms, popula-  
82 tions routinely achieve increased thermal tolerance in warmer seasons (Hop-  
83 kin et al., 2006; Bujan et al., 2020). This suggests that mechanisms enabling  
84 seasonal responses, such as plasticity and adaptation, might similarly drive  
85 resilience to global warming.

86 Copepods provide an ideal model to understand population level re-  
87 sponses to fluctuating selection across seasons. These organisms are short-  
88 lived with generation times of a few weeks leading to multiple generations  
89 per year, each subjected to a unique thermal regime. Previous work on ther-  
90 mal tolerance of copepods has found contributions of both plasticity and  
91 adaptation. For instance, rearing temperature drives plastic responses and  
92 significantly influences thermal tolerance (González, 1974), egg production  
93 (Holste and Peck, 2006) and growth (Sasaki and Dam, 2020). Temperature  
94 also affects adult body size with warmer temperatures leading to smaller  
95 individuals (Viitasalo et al., 1995; Sasaki et al., 2019), consistent with the  
96 temperature-size rule (Atkinson, 1994). Conversely, there is ample evidence  
97 for local adaptation to temperature (Lonsdale and Levinton, 1985; Pereira  
98 et al., 2017; Karlsson and Winder, 2020) as well experimental evolution stud-  
99 ies showing adaptive responses to high temperature after only a few gener-  
100 ations (Dam et al., 2021; Brennan et al., 2022b). Finally, planktonic cope-  
101 pods are an integral part of marine food webs and function as an essential  
102 link between primary production and higher trophic levels (Turner, 2004;  
103 Dzierzbicka-Głowacka et al., 2019). Therefore, our understanding of drivers  
104 of copepod responses to temperature change has important implications for  
105 the resilience of marine ecosystems as a whole.

106 In this study, we focus on the calanoid copepod *Acartia hudsonica* (Pin-  
107 hey, 1926). *Acartia* copepods are among the most-studied copepod genera,  
108 in part due to their world-wide distribution and high abundance, making  
109 them foundational to marine and coastal ecosystems (Walter and Boxshall,  
110 2023). In the Baltic Sea, this group is one of the dominant zooplankton and

111 critical to local ecosystems (Diekmann et al., 2012; Dzierzbicka-Głowacka  
112 et al., 2019). *Acartia hudsonica*, specifically, is a cold adapted species that is  
113 generally abundant in winter and spring months out-competing more warm  
114 adapted congeners at low temperatures. The species can tolerate a broad  
115 temperature range from at least 4 to 18 °C (Sullivan and McManus, 1986).  
116 For populations native to the Eastern United States, *A. hudsonica* produces  
117 resting eggs at temperatures  $> 16$  °C and abundances strongly decline in  
118 summer (Sullivan and McManus, 1986).

119 Here, we seek to disentangle the impacts of adaptation from plasticity in  
120 thermal tolerance of *A. hudsonica* collected throughout spring and summer of  
121 2022. We hypothesized that the thermal tolerance of wild collected individ-  
122 uals would closely follow the environmental temperature. Further, because  
123 developmental temperature strongly impacts copepod body size (Horne et al.,  
124 2016), we predicted that body size would decrease as temperature increased.  
125 We used common garden conditions at two different temperatures to deter-  
126 mine if the observed thermal tolerance and body size shifts between wild  
127 individuals were driven by adaptation or plasticity. Together, these results  
128 help to reveal the underlying mechanisms driving seasonal thermal tolerance  
129 of *A. hudsonica* and provide insight into how this species may respond to  
130 warming conditions in the future.

## 131 **2. Material & Methods**

### 132 *2.1. Sampling and cultures*

133 All samples were collected by 100  $\mu\text{m}$  WP2 net on board the research  
134 vessel *Polarfuchs* in Kiel Fjord (54°19'50"N 10°09'20"E). Live samples were

135 stored at collection temperature until processing. The experiment included  
136 five sampling dates (referred to as collections) from April 2022 to July 2022  
137 that spanned SST from 5.81 °C to 19.16 °C (Table 1, Hiebenthal et al. un-  
138 published data).

Table 1: Overview of sampling dates and corresponding SST averages.

| Collection name | Collection date | Daily mean     | 2-week mean    |
|-----------------|-----------------|----------------|----------------|
| Collection 1    | 06 Apr 2022     | 5.81 ±0.05 °C  | 6.36 ±0.47 °C  |
| Collection 2    | 16 May 2022     | 12.66 ±0.53 °C | 11.44 ±0.84 °C |
| Collection 3    | 13 Jun 2022     | 12.37 ±0.33 °C | 12.86 ±1.52 °C |
| Collection 4    | 27 Jun 2022     | 18.35 ±0.13 °C | 16.55 ±1.83 °C |
| Collection 5    | 19 Jul 2022     | 19.16 ±0.79 °C | 18.11 ±0.68 °C |

139 For all sampling dates, approximately 440 adult animals were sorted and  
140 split into two 6 L culture buckets with air supply and held at their collection  
141 temperature. Over the following two days,  $CT_{max}$  assays were run on the  
142 wild-caught copepods. After the initial assays, the cultures were moved to  
143 a cold (11 °C) or warm (18 °C) culture room. No major fluctuations in  
144 temperature occurred throughout the experiment. All cultures were kept on  
145 a 12:12 light regime at a common salinity of 15 and were allowed to reproduce,  
146 with water changes approximately every 7 days. Feeding was *ad libitum* with  
147 *Rhodomonas sp.* and *Isochrysis galbana* (Holste and Peck, 2006; Ismar et al.,  
148 2008; Mahjoub et al., 2014).

149 After the initial culture establishment at treatment temperatures (2-4



150 days), the cultures were filtered through a nested 200  $\mu\text{m}$  and 50  $\mu\text{m}$  mesh  
151 sieve. Adults were retained on the 200  $\mu\text{m}$  mesh and kept for further cultur-  
152 ing. Offspring, eggs and nauplii, of the parental generation were retained on  
153 the 50  $\mu\text{m}$  mesh and placed in a new culture bucket to start the F1 gener-  
154 ation. Development was monitored to catch the onset of maturation. Once  
155 the F1 generation reached adulthood,  $\text{CT}_{max}$  assays were repeated. Collec-  
156 tion 3 collapsed before reaching F1. Therefore, this collection is excluded  
157 from further analysis.

## 158 2.2. Temperature assays

159  $\text{CT}_{max}$  was used as a proxy for thermal tolerance.  $\text{CT}_{max}$  is defined as  
160 the temperature at which locomotion is affected in a way that prevents the  
161 individual to move away from harmful conditions, eventually resulting in  
162 death (Cowles and Bogert, 1944). In this study,  $\text{CT}_{max}$  was the temperature  
163 at which the individuals showed no visible response to a stimulus (details  
164 below). For each collection and treatment the  $\text{CT}_{max}$  of twenty males and  
165 twenty females was quantified. Individuals were sorted under temperature-  
166 controlled conditions and placed in 12 ml glass tubes filled with 5 ml of filtered  
167 seawater. Ten individuals, five males and five females were simultaneously  
168 run per trial. The starting temperature of the experimental tank matched  
169 the wild collection or culturing temperature. To minimize bias, an assistant  
170 placed the individuals in random order in the experimental tank, leaving the  
171 experimenter blinded to the animals' sex until after the experiment. Heating  
172 was monitored with a thermometer (PCE-HPT1, PCE instruments, Men-  
173 schede, Germany) placed into an additional glass tube filled with filtered  
174 seawater. The animals were given a 30-minute acclimation period before

175 heating was started. With a 300 W and 500 W heater, heating was con-  
176 sistent at  $\sim 0.2$  °C/min (Fig. S.1). Once 22.5 °C was reached, the 300 W  
177 heater was removed, slowing the ramping temperature to  $\sim 0.1$  °C/min to  
178 facilitate monitoring the individuals. Throughout the experiment, the exper-  
179 imenter was blinded to the exact temperature. Animals were continuously  
180 monitored and when movement ceased, gentle pipetting was used to trigger  
181 a reaction. If still no movements occurred, the corresponding temperature  
182 was considered  $CT_{max}$ .

183 After the experiment, the sex for all animals was confirmed and the indi-  
184 viduals were preserved in 95% ethanol and later photographed using a Nikon  
185 imaging microscope and Nikon imaging software (NIS-Elements v. 5.20.00).  
186 All images were obtained using the same magnification to ensure consistency.  
187 From the pictures, the prosome length was measured for each copepod using  
188 ImageJ (Schneider et al., 2012). Three measurements were obtained per in-  
189 dividual and averaged in the later analysis. While formalin is usually used to  
190 preserve plankton samples for length analysis (Connolly et al., 2017; Aguilera  
191 et al., 2020), previous work on zooplankton has shown no effect of ethanol  
192 preservation on body size (Black and Dodson, 2003) and any size effect would  
193 be consistent across the experiment. Further, ethanol preservation allows for  
194 downstream genetic analyses, which is essential when dealing with cryptic  
195 copepod species.

### 196 *2.3. Genotyping*

197 To confirm species identity, 4-15 copepods per collection were genotyped  
198 using the mtCOI region (Table S.1). For the DNA extraction, ethanol-  
199 preserved copepods were rinsed with ultra-clean water and rehydrated for

200 one hour. Individual copepods were transferred into 100  $\mu$ l of 5% Chelex  
201 solution, incubated for 20 minutes at 95 °C in a water bath, then centrifuged  
202 for 5 minutes at 8000 rpm. PCR reactions were conducted in 20  $\mu$ l volume  
203 with 9.8  $\mu$ l ultra clean water, 2  $\mu$ l dNTPs, 2  $\mu$ l Buffer, 2  $\mu$ l LCO1490 for-  
204 ward primer or HCO2198 reverse primer (5mM, Folmer et al. (1994)), 0.2  $\mu$ l  
205 DreamTaq DNA polymerase (Thermo Fisher Scientific Inc., Massachusetts,  
206 US), and 2  $\mu$ l of DNA.

207 Amplification conditions were: 3 min of denaturation at 94 °C followed  
208 by 33 cycles of 45 s denaturation at 94 °C, 45 s annealing at 48 °C, 60 s  
209 extension at 72 °C and a final extension at 72 °C for 7 min. Samples were  
210 sequenced on a Sanger sequencing platform by Eurofins Deutschland (Ger-  
211 many). Sequences were checked and aligned to generate consensus sequences  
212 using CodonCodeAligner (CODONCODE, 2010). The *Acartia* genus consists  
213 of multiple cryptic species making species identification difficult. Therefore,  
214 we followed Figueroa et al. (2020) and used a bayesian approach to determine  
215 species and clade for all samples. Using known samples from Figueroa et al.  
216 (2020), we aligned all raw reads with MUSCLE (Edgar, 2004), converted  
217 to NEXUS format in R using APE (Paradis and Schliep, 2019), and used  
218 MrBayes to build a phylogenetic tree with *Acartia dana* as the outgroup.  
219 Tree plots were made using *ggtree* (Yu et al., 2017). Since thermal tolerance  
220 measurements showed outliers in collections 4 and 5, 38 experimental outliers  
221 and additional trial animals from those collections were genotyped.

#### 222 2.4. Data analysis and statistics

223 Data manipulation, visualization, and statistics were conducted in R ver-  
224 sion 4.2.2 (R Core Team, 2022).

225 To understand the factors influencing  $CT_{max}$  and length we used gener-  
226 alized linear models. Model selection was done by comparing model fit and  
227 Akaike's information criterion (AIC) as well as considering biological rele-  
228 vance. The models included main effects of collection number (1-5), treat-  
229 ment (wild, warm, cold), sex, length, and the interaction of treatment and  
230 collection. Random effects of vial number, tank used for the trial, and time  
231 of day did not improve model fit and were therefore excluded from the final  
232 models. A similar model was used to determine the factors influencing cope-  
233 pod length. Here, we included main effects of developmental temperature  
234 and sex. Pairwise post-hoc testing was done comparing the model means  
235 using the *emmeans* package (Lenth, 2023).

### 236 3. Results

237 The sampling days spanned SST values from 5.81 °C to 19.16 °C (Fig. 1A;  
238 see Table 1 for all values and standard deviations). The thermal tolerance of  
239 wild-caught individuals mirrored the environmental temperature (Fig. 1B).  
240  $CT_{max}$  values were lowest in Collection 1 (25.9 °C  $\pm$  1.4 °C), where the tem-  
241 perature over the two weeks prior to sampling averaged 6.36 °C  $\pm$  0.47 °C.  
242  $CT_{max}$  then increased throughout the collections (Col-2: 27.9 °C  $\pm$  0.7 °C;  
243 Col-3: 27.9 °C  $\pm$  1.0 °C; Col-4: 29.1 °C  $\pm$  0.6 °C), reaching its maximum at  
244 Collection 5 (29.8 °C  $\pm$  2.0 °C), where the two-week SST average was 18.11  
245 °C  $\pm$  0.68 °C (Spearman's  $\rho = 0.758$ ,  $p < 0.001$ ). The prosome length of wild  
246 individuals showed an opposite trend, with size decreasing as SST increased  
247 (Fig 1C, Spearman's  $\rho = -0.572$ ,  $p < 0.001$ ). Two week averages were chosen  
248 to characterize SST as this is the approximate the amount of time it takes

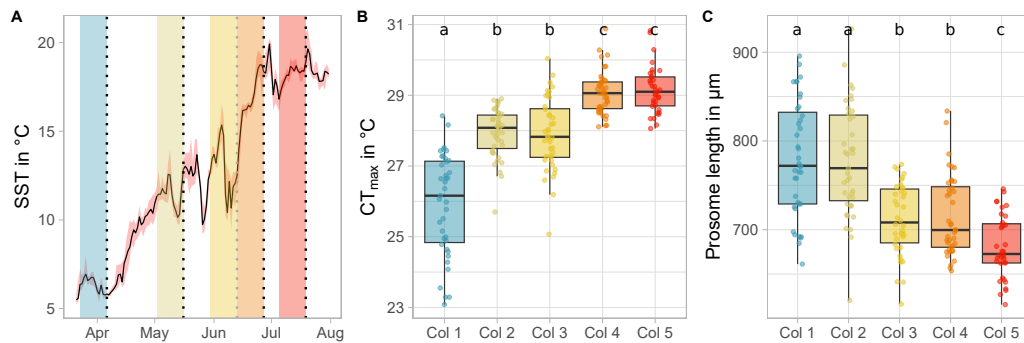

Figure 1: Thermal tolerance follows the seasonal changes in temperature. (A) Sea surface temperature at the collection site where sampling points are indicated by dotted lines and shaded boxes indicate the two-week period prior to sampling. (B) Critical thermal maxima and (C) mean prosome length for wild collected individuals. Boxplot colors correspond to sampling date and compact letters show the results from post-hoc tests where shared letters indicate no significant difference between measurements.

249 for copepods to mature from egg to adult and can therefore be considered  
250 developmental temperature; the two-week average showed a similar trend to  
251 daily mean temperatures (Fig. S.2).

252 Following the common garden, there was a significant effect of treatment,  
253 collection and the interaction between treatment and collection on  $CT_{max}$   
254 (Fig. 2A,  $p < 0.001$  for all, see Table S.3) for detailed report). While  $CT_{max}$   
255 of the wild individuals varied depending on the SST around sampling, the  
256 thermal tolerance measurements within the cold and warm treatment were  
257 similar across collections. The weighted model means for all warm treatments  
258 did not significantly differ from each other (col-1:  $28.7\text{ }^{\circ}\text{C} \pm 0.5\text{ }^{\circ}\text{C}$ , col-2:  $28.6$   
259  $^{\circ}\text{C} \pm 0.5\text{ }^{\circ}\text{C}$ , col-4:  $29.0\text{ }^{\circ}\text{C} \pm 0.6\text{ }^{\circ}\text{C}$ ,  $p \geq 0.578$ ) and were comparable to the  
260 wild collections 4 and 5 ( $29.1\text{ }^{\circ}\text{C} \pm 0.6\text{ }^{\circ}\text{C}$  and  $29.2\text{ }^{\circ}\text{C} \pm 0.7\text{ }^{\circ}\text{C}$  respectively,  $p$

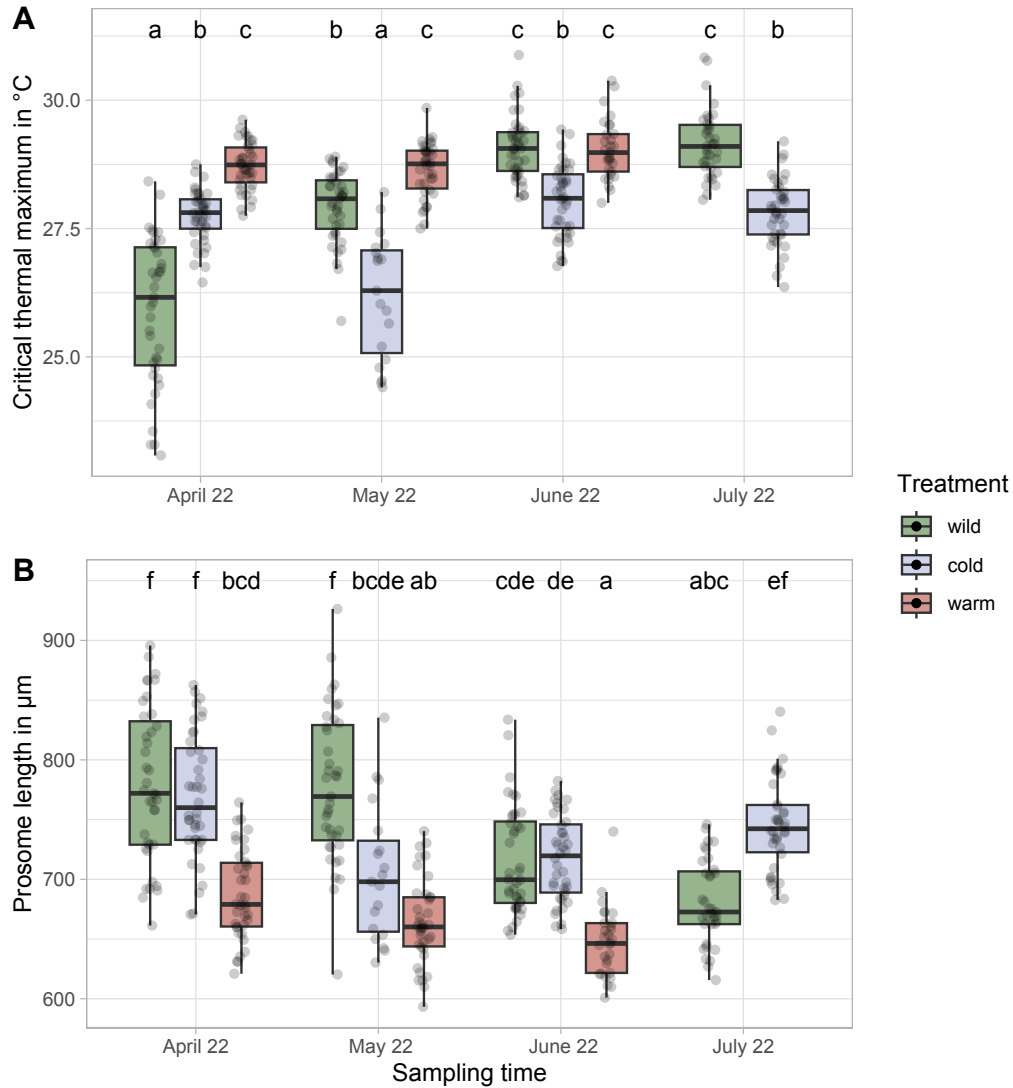

Figure 2: Phenotyping results following common garden for (A) critical thermal maxima and (B) prosome length. Colors of boxes correspond to treatment where "wild" are field collected animals, "cold" are F1 animals at 11°C, "warm" are F1 animals at 18°C. Compact letters show the results from post-hoc tests where shared letters indicate no significant difference between measurements.

261  $\geq 0.153$ ) where the mean temperature resembled the warm treatment (warm  
262 treatment 18 °C, wild SST 16.55 °C  $\pm$  1.83 °C, and 18.11 °C  $\pm$  0.68 °C respec-  
263 tively). For the cold treatment, weighted means did not differ significantly  
264 (col-1: 27.7 °C  $\pm$  0.5 °C, col-4: 28.0 °C  $\pm$  0.7 °C, col-5: 27.8 °C  $\pm$  0.6 °C,  $p \geq$   
265 0.789) and were comparable to the thermal tolerance of the wild collection  
266 2 (27.9 °C  $\pm$  0.7 °C,  $p \geq 0.992$ ) where the developmental temperature was  
267 similar (cold treatment 11 °C, wild SST 11.44 °C  $\pm$  0.84 °C). The exception  
268 was the cold treatment of collection 2, which was significantly lower than  
269 the other cold collections ( $p < 0.001$ ). Here,  $CT_{max}$  was comparable to the  
270 mean of the wild individuals within collection 1 (col-1: 25.9 °C  $\pm$  1.4 °C, col2:  
271 26.2  $\pm$  1.2 °C,  $p = 0.965$ ) despite the treatment temperatures differing by  $\sim$   
272 4 °C. The effect of treatment, collection on prosome length and the inter-  
273 action of both terms were significant (Fig. 2B,  $p < 0.001$  for all, see Table  
274 S.3). However, post-hoc testing revealed that there were no clear similari-  
275 ties within treatments, suggesting a more complicated connection between  
276 prosome length, seasonality and common garden temperature.

277 There was a strong plastic effect of developmental temperature on thermal  
278 performance and prosome length ( $p < 0.001$ , Fig. S.4). The reaction norms  
279 for treatment effect on  $CT_{max}$  showed a positive effect of treatment temper-  
280 ature (Fig. 3A). There was a significant interaction between collections that  
281 was driven by the outlier col-2 and when col-2 was removed there was no  
282 interaction (with col-2:  $p < 0.001$ , without col-2:  $p = 0.897$ ). Prosome length  
283 was negatively affected by treatment temperature (Fig. 3B). Again, a signif-  
284 icant interaction was driven by col-2, that was not present when removing  
285 the outlier collection (with col-2:  $p = 0.019$ , without col-2:  $p = 0.372$ ). The

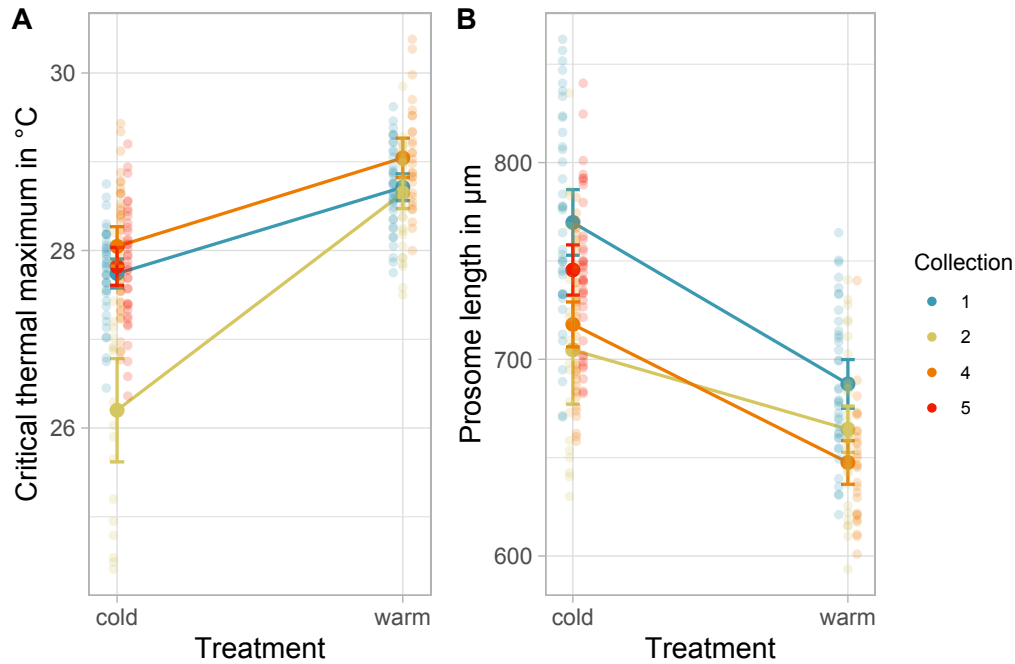

Figure 3: Reaction norms for treatment effect on (A) Critical thermal maximum; (B) Prosome length; bold points indicate mean values, error bars indicate 0.95 % confidence interval.

286 similar slopes of reaction norms and the absence of an interaction between  
287 treatment and collection support the presence of plasticity.

288 Furthermore, there was an increase of  $CT_{max}$  with increasing developmen-  
289 tal temperature (Spearman's  $\rho = 0.718$ ,  $p < 0.001$ ). Conversely, prosome  
290 length was negatively correlated with developmental temperature, where  
291 higher temperatures during development led to smaller individuals (Spear-  
292 man's  $\rho = -0.566$ ,  $p < 0.001$ ). These effects were present in both male and  
293 female animals, however, females had significantly higher thermal tolerance  
294 and larger body size compared to males ( $CT_{max}$  females:  $28.4 \text{ }^\circ\text{C} \pm 1.21 \text{ }^\circ\text{C}$ ,  
295 males:  $27.7 \text{ }^\circ\text{C} \pm 1.21 \text{ }^\circ\text{C}$ , length females:  $744 \text{ } \mu\text{m} \pm 69 \text{ } \mu\text{m}$ , males:  $694 \text{ } \mu\text{m}$



296  $\pm 44 \mu\text{m}$ ,  $p < 0.001$  for both).

297 In addition to the correlation of developmental temperature, there was  
298 a negative correlation between prosome length and  $CT_{max}$  in wild animals  
299 where smaller individuals had significantly higher thermal tolerance ( $p <$   
300  $0.001$ , Pearson'  $r = -0.229$ , Fig. 4A). While this result was likely driven by  
301 the aforementioned relation of developmental temperature and length, the  
302 negative trend was also present, though weaker, when looking only at the  
303 warm treatment common gardened animals ( $p = 0.038$ , Fig. 4B); no effect  
304 was observed within cold common gardened treatments ( $p = 0.108$ , Fig. 4B).

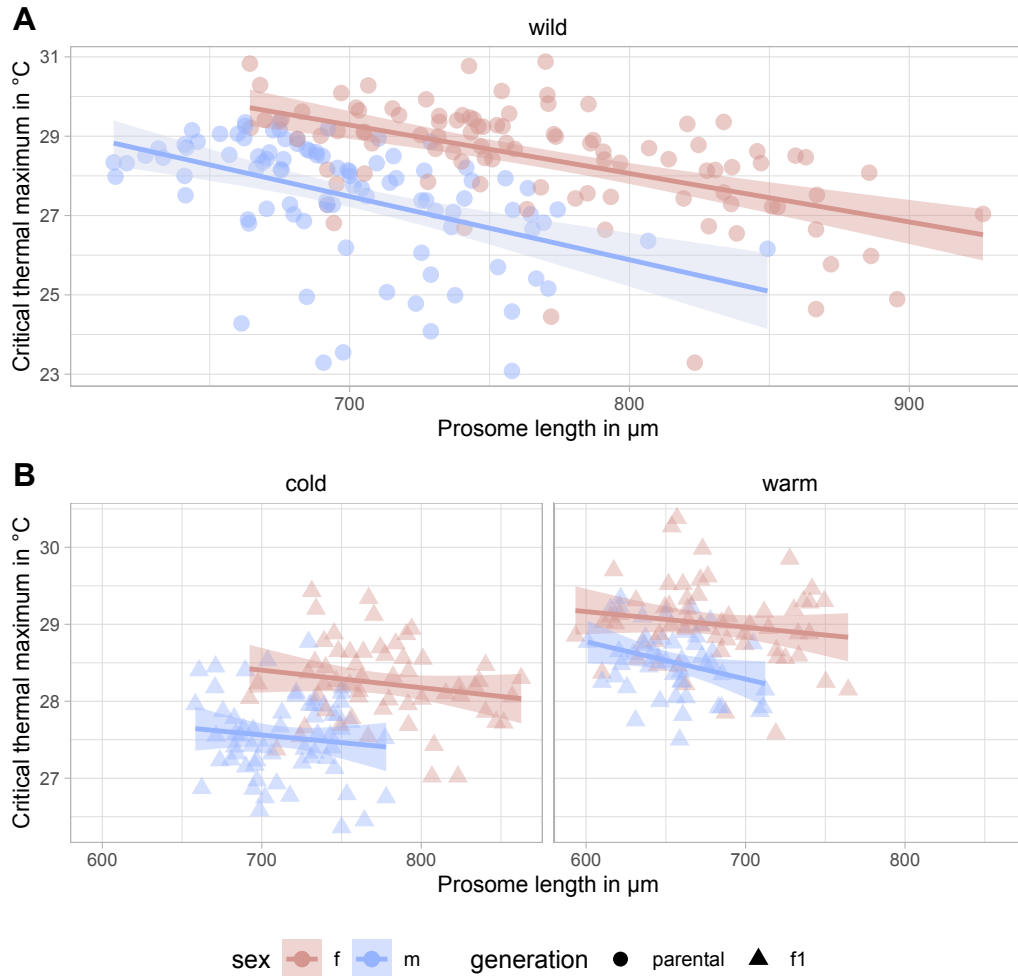

Figure 4: Correlation between prosome length and  $CT_{max}$  in *A. hudsonica*, (A) Parental generation, length has a significant effect on  $CT_{max}$  ( $p < 0.001$ ,  $R^2 = 0.35$ ) (B) F1 generation; cold treatment: no significant effect of length on  $CT_{max}$  ( $p = 0.108$ ,  $R^2 = 0.323$ ); warm treatment: a significant effect of length on  $CT_{max}$  ( $p = 0.038$ ,  $R^2 = 0.242$ ). Linear regression per sex with 95% confidence interval.

## 305 4. Discussion

306 Seasonal fluctuations have strong physiological effects on organisms occu-  
307 pying these variable conditions. We hypothesized that the thermal tolerance  
308 of copepods would closely mirror their developmental temperature and that  
309 both plastic and genetic mechanisms would contribute to the physiological  
310 change observed. As predicted, the  $CT_{max}$  of *A. hudsonica* increased in  
311 parallel with environmental temperature. However, under common garden  
312 conditions collections showed similar levels of plasticity and converged on  
313 common thermal tolerances and body sizes, indicating that phenotypic dif-  
314 ferences between collection times were driven by plasticity with no evidence  
315 for rapid adaptation. Together, these results indicate that *A. hudsonica* has  
316 substantial phenotypic plasticity to rapidly acclimate to large changes in  
317 external temperature.

### 318 4.1. Seasonal variation in thermal tolerance

319 For both marine and terrestrial ectotherms, the ability to rapidly ac-  
320 climate to changes in environmental temperature is common and adaptive  
321 (Gunderson and Stillman, 2015). In coastal marine organisms, particularly  
322 those from temperate environments, the presence of thermal plasticity is  
323 essential as shallow waters tend have high variance in their temperatures, re-  
324 quiring rapid phenotypic responses (Reusch, 2014). This is particularly true  
325 for intertidal copepods which can experience daily temperature changes of  
326 nearly 10°C (Leong et al., 2017) and therefore have high thermal tolerance  
327 and plasticity (Healy et al., 2019). Further, across copepods there is near  
328 universal presence of thermal plasticity that is dependent on environmental

329 temperature (Sasaki and Dam, 2021). For *Acartia* copepods specifically, *A.*  
330 *tonsa* and *A. hudsonica* from the east coast of the United States are typically  
331 plastic in their thermal tolerance (Sasaki and Dam, 2020) and laboratory  
332 studies on *A. tonsa* show large effects of acclimation on thermal tolerance  
333 (Sunar and Kir, 2021). Thus, plasticity plays an important role in enabling  
334 most marine copepods to tolerate environmental temperature fluctuations.

335 While the Baltic Sea experiences only small wind-driven and irregular  
336 tides, the variation in water temperature at our collection site is neverthe-  
337 less high, ranging from 5.65 °C to 20.70 °C during the study period. This  
338 high and relatively predictable variation likely favors the evolution of plas-  
339 ticity observed in the population (Bitter et al., 2021). Indeed, previous work  
340 has shown that *Acartia tonsa* from less variable low latitude thermal envi-  
341 ronments harbor lower levels of phenotypic plasticity than those from more  
342 variable high latitude sites (Sasaki and Dam, 2020), consistent with the lati-  
343 tudinal hypothesis of plasticity (Janzen, 1967; Ghalambor et al., 2006). Sim-  
344 ilarly, Sasaki and Dam (2020) found that seasonal variation in thermal LD50  
345 of *A. hudsonica* from the east coast of North America was driven by plasticity  
346 rather than adaptation. Therefore, the plasticity that *A. hudsonica* harbors  
347 to respond to changing temperature across the season is likely adaptive in  
348 this environment and is present across multiple populations.

349 The lack of seasonal adaptation is in contrast to the evidence of this phe-  
350 nomenon in other systems including both terrestrial *D. melanogaster* (John-  
351 son et al., 2023) and the sister species to *A. hudsonica*, *A. tonsa* (Sasaki and  
352 Dam, 2020). For *A. tonsa*, Sasaki and Dam (2020) found that collections  
353 from different time points differed in their plasticity. It is unclear exactly

354 what drove the seasonal patterns in *A. tonsa*, but it may be due to the pres-  
355 ence of cryptic lineages emerging or surviving at different temperatures. The  
356 comparison to *D. melanogaster* is also interesting as terrestrial organisms  
357 typically have a better ability than marine organisms to buffer their thermal  
358 environment via behavioral mechanisms, known as the Bogert effect (Bogert,  
359 1949). *Acartia* copepods have enormous populations sizes that are regularly  
360 in the hundreds of individuals per cubic meter of water (Möllmann, 2002).  
361 Therefore, the efficiency of selection may be similar between *Acartia* and  
362 *Drosophila*. Given this, one might expect similar signals of seasonal adapta-  
363 tion in our system relative to *Drosophila*; we observed no evidence to support  
364 this expectation.

365 There are a number of possible explanations for the lack of seasonal adap-  
366 tation in our study. First, *A. hudsonica* may have sufficient plasticity to  
367 respond to the seasonal thermal environment. Given the Bogert effect, envi-  
368 ronmental temperature is directly experienced to a greater degree in marine  
369 systems and selection for plasticity may be strong and result in a highly  
370 flexible phenotype. Alternatively, there may be no heritable genetic varia-  
371 tion for thermal tolerance in this population. However, populations of *A.*  
372 *hudsonica* from North America can rapidly evolve to elevated temperatures  
373 under laboratory conditions (deMayo et al., in press) and there is evidence  
374 for local adaptation to temperature along latitudinal gradients in the sister  
375 species, *Acartia tonsa* (Sasaki and Dam, 2019). Therefore, it is likely that  
376 heritable variation in thermal tolerance is also present in this species and  
377 population. An alternative explanation is that the phenotypes of focus were  
378 not under selection or sensitive enough to capture any adaptive responses.

379 The temperatures at the collection site did not approach the critical ther-  
380 mal limit measured in the lab (maximum SST during sampling: 20.70 °C).  
381 Therefore, it is unlikely that  $CT_{max}$  was directly under selection. It is possi-  
382 ble that an alternative phenotype would show a seasonal adaptive response  
383 as has been observed in other systems (Hairston and Dillon, 1990; de Ville-  
384 mereuil et al., 2020). Finally, much of the evidence for seasonal adaptation  
385 in *D. melanogaster* has been found at the genomic level (Johnson et al.,  
386 2023). Given this, our populations may similarly be experiencing fluctuating  
387 selection that would be detectable using genomic approaches.

388 While we observed high levels of plasticity for  $CT_{max}$ , under future tem-  
389 perature conditions it is unlikely that most ectotherms have sufficient plastic-  
390 ity to respond to temperature changes without adaptive responses (Gunder-  
391 son and Stillman, 2015). Indeed, DeMayo et al showed that under warming  
392 conditions, plasticity alone is insufficient to maintain high population fitness  
393 in *A. hudsonica* (deMayo et al., in press). However, the species can rapidly  
394 adapt after just four generations to recover fitness levels. Therefore, it is  
395 likely that both plasticity and adaptation will be required to tolerate future  
396 environmental conditions and more work is needed to understand the relative  
397 contribution of each to overall resilience.

#### 398 *4.2. Plasticity in body size and potential potential impacts of warming*

399 As temperatures increased, body size decreased in *A. hudsonica* (Fig.  
400 1), a common phenomenon across ectotherms known as the temperature-size  
401 rule (Angilletta and Dunham, 2003; Rubalcaba and Olalla-Tárraga, 2020).  
402 This concept applies to copepods (Escribano and McLaren, 1992; Viitasalo  
403 et al., 1995), including those from tropical (Ortega-Mayagoitia et al., 2018)

404 and temperate environments (Riccardi and Mariotto, 2000). However, other  
405 factors such as phytoplankton density may affect the body size of individ-  
406 uals in the wild (Deevey, 1964, 1966), though this would not have affected  
407 the common garden animals in our study. The reduction in body size in  
408 response to increasing temperature may be driven by the disproportionate  
409 increase in respiration and metabolism relative to ingestion and assimilation  
410 of nutrients (Lehman, 1988), leading to lower overall energy available for  
411 growth and therefore a smaller body size. Further, there may be a trade-off  
412 that favors smaller individuals at high temperatures; reproductive efficiency,  
413 the ratio of egg production and respiration, is maximized at smaller body  
414 sizes and therefore may be adaptive in warmer temperatures. Similarly, at  
415 higher temperatures oxygen availability (aerobic scope) may be decreased in  
416 larger individuals relative to smaller individuals, favoring smaller body sizes  
417 (Rubalcaba et al., 2020). Alternatively, in cold temperatures growth periods  
418 may be prolonged while the growth rate remains relatively stable, leading to  
419 larger individuals under cold conditions (Vidal, 1980).

420       Regardless of the mechanism, as temperatures warm due to anthropogenic  
421 causes, decreases in body size may affect ecosystem interactions. This is par-  
422 ticularly true in the Baltic Sea where the heating rate is around three times  
423 higher than the ocean average due to its unique topography (Reusch et al.,  
424 2018; Szymczycha et al., 2019; Dutheil et al., 2022). A size reduction in  
425 *A. hudsonica*, or other prey organisms, might impact higher trophic level  
426 predators, for example by requiring the consumption of more individuals to  
427 maintain the same amount of nutrient intake (Garzke et al., 2015). If abun-  
428 dance does not increase with decreasing body size, nutrient availability may

429 be reduced for consumers who will also require increased energy needs un-  
430 der higher temperature (Brown et al., 2004). Further, Garzke et al. (2015)  
431 observed that large copepods from colder temperatures clear algae biomass  
432 more efficiently than smaller individuals, exerting top-down control on phy-  
433 toplankton. This in turn suggests that smaller copepods are less efficient  
434 grazers, with less control over the planktonic community. As copepods are  
435 important grazers on large phytoplankton and microzooplankton (Sommer  
436 et al., 2003; Armengol et al., 2017), less efficient grazing or a shift to different  
437 prey size classes might have unforeseen cascading effects across ecosystems.

438 Finally, the correlation between body size and  $CT_{max}$  (Fig. 4) suggests  
439 that body size itself may influence the thermal tolerance of an individual  
440 with small body size being of advantage in warm environments. While the  
441 effect was weak in comparison with the effects of developmental temperature  
442 and the mechanistic link between body size and thermal tolerance remains  
443 unknown, this relationship could potentially be used to predict an individ-  
444 ual's thermal tolerance. This may be of interest when analyzing historical  
445 samples where body size measurements from the same location across years  
446 could enable predictions about past thermal tolerance and environmental  
447 temperatures. More work would be needed to develop these predictions.

#### 448 *4.3. Outliers and mixed species*

449 The outliers in collection 2 under cold conditions, characterized by un-  
450 expectedly low thermal tolerance and small body sizes, were most likely the  
451 result of an impending culture collapse. This was potentially caused by poor  
452 food quality during that period due to ciliate and bacteria growing in the  
453 algae cultures used for feeding. The negative effects of ciliates on copepod



454 fitness are well described with effects ranging from decreased egg produc-  
455 tion (Burris and Dam, 2014) to increased adult mortality (Visse, 2007). The  
456 species identity of the ciliates in this study could not be determined. How-  
457 ever, ciliate peak abundances correlated with culture collapse, and after the  
458 establishment of more frequent water changes, the cultures improved. Since  
459 the survival and fitness of the animals was clearly affected by external factors  
460 unrelated to the experiment, length and thermal tolerance measurements for  
461 the cold treatment in collection 2 should be treated with caution and were  
462 therefore excluded from parts of the analysis.

463 In the wild collection 5, five individuals showed a  $CT_{max}$  above 33 °C,  
464 which was well beyond the distribution of values for any other collection  
465 (Fig. S.5). In the F1 generation, the warm treatment of collection 4 and  
466 5 and the cold treatment of collection 5 also had similar high performing  
467 individuals (11, 40, and 2 individuals, respectively) (Fig. S.5). These ex-  
468 treme outliers suggested a mixed species composition, which was confirmed  
469 by genotyping individuals of each collection as well as high thermal outliers  
470 (see Supplement *Mixed species*). High thermal outlier individuals were *A.*  
471 *tonsa* without exception (Table S.1, Fig. S.6). The increased thermal toler-  
472 ance for *A. tonsa* relative to *A. hudsonica* is consistent with other studies.  
473 On the east coast of North America, *A. hudsonica* dominates plankton com-  
474 munities early in the year when water temperatures are low and is replaced  
475 by *A. tonsa* as temperatures increase (Borkman et al., 2018; Sullivan and Mc-  
476 Manus, 1986). This pattern appears to be similar for copepod communities  
477 in Kiel Bight as well. Since *A. tonsa* was present only in later collections and  
478 just as individual outliers, this paper could not determine how thermal tol-

479 erance of *A. tonsa* changes within a season. However, we would hypothesize  
480 that *A. tonsa* follows an overall similar trend than shown for *A. hudsonica*  
481 with thermal tolerances shifted towards warmer temperatures. Additional  
482 experiments would be required to test this hypothesis.

#### 483 4.4. First record of *A. hudsonica* in the Baltic Sea

484 From our literature and database review, the molecular barcoding in this  
485 study is the first record of *A. hudsonica* in the Baltic Sea. There are two  
486 possible explanations for this novel species presence. First, *A. hudsonica*  
487 may have recently invaded the Baltic Sea. In the North Sea, *A. omori* – a  
488 species that co-occurs with *A. hudsonica* off the Japanese coast (Ueda, 1987)  
489 – was first described by Seuront (2005) in the early 2000. The successful  
490 invasion of *A. omori* suggests that *A. hudsonica* could similarly have been  
491 introduced to the North Sea. As the North Sea and Baltic Sea are connected,  
492 it is possible that *A. hudsonica* then moved to the Baltic Sea. Alternatively,  
493 there is ample shipping in the region and an independent local introduction  
494 could have occurred.

495 Secondly, it cannot be ruled out that *A. hudsonica* has historically been  
496 misidentified in the Baltic Sea. Copepods from the genus *Acartia* have a  
497 record of mis-identifications in databases and are difficult to distinguish mor-  
498 phologically (Figueroa et al., 2020). Instead, phylogenetic methods are re-  
499 quired for accurate species identification. Before the 1970's, *A. hudsonica*  
500 was a subspecies of *A. clausi*, but is now considered its own species (Brad-  
501 ford, 1976; Ueda, 1986). Given this, it is possible that *A. hudsonica* is native  
502 to the Baltic Sea but has been, and still is, commonly identified as *A. clausi*.

## 503 **5. Conclusions**

504 Here we showed that *Acartia hudsonica* has high phenotypic plasticity  
505 in response to changing temperature within a single year. We found that  
506 thermal tolerance closely tracks environmental temperature, indicating that  
507 *A. hudsonica* has capacity to tolerate increasing temperatures that fall within  
508 the current range experienced in nature. However, the observed decrease in  
509 body size suggests that nutrient availability and ecosystem functioning could  
510 be impacted if temperatures consistently increase with no change in copepod  
511 abundance. By focusing on the relative impacts of plasticity and adaptation  
512 to population responses to temperature change we can begin to understand  
513 the resilience populations and ecosystems to ongoing global change.

## 514 **Acknowledgement**

515 We thank Catriona Clemmesen-Bockelmann for her support during the  
516 project and Tobias Strickmann for collecting the samples. We thank Fabian  
517 Wendt and Diana Gill for their guidance in animal cultivation and lab work.  
518 Further, we thank Gianina Consing, Sheena Chung, Myria Schröder and  
519 Friederike Gronwald for assisting with experimental work and lab work. This  
520 project was partially funded by the German Research Foundation BR6839/1-  
521 1 (to R.B).

## 522 **Conflicts of interest**

523 The authors declare that there is no conflict of interest to disclose.

524 **Data accessibility**

525 The data set and scripts can be found on [https://github.com/HahnAlexandra/](https://github.com/HahnAlexandra/Plasticity_Acartia_hudsonica)  
526 [Plasticity\\_Acartia\\_hudsonica](#). The individual sequences are uploaded on  
527 NCBI GenBank <https://www.ncbi.nlm.nih.gov/genbank/>, find individ-  
528 ual accession numbers in Table S.1. SST data from Kiel Fjord will be made  
529 available on <https://www.pangaea.de> by our collaborator Claas Hiebenthal.

530 **References**

531 Aguilera, V.M., Vargas, C.A., Dam, H.G., 2020. Antagonistic interplay be-  
532 tween pH and food resources affects copepod traits and performance in  
533 a year-round upwelling system. *Scientific reports* 10, 62. doi:10.1038/  
534 s41598-019-56621-6.

535 Angilletta, M. J., J., Dunham, A.E., 2003. The temperature-size rule in  
536 ectotherms: simple evolutionary explanations may not be general. *Am Nat*  
537 162, 332–42. URL: <https://www.ncbi.nlm.nih.gov/pubmed/12970841>,  
538 doi:10.1086/377187.

539 Armengol, L., Franchy, G., Ojeda, A., Santana-del Pino, Á., Hernández-  
540 León, S., 2017. Effects of copepods on natural microplankton communi-  
541 ties: do they exert top-down control? *Marine Biology* 164. doi:10.1007/  
542 s00227-017-3165-2.

543 Atkinson, D., 1994. Temperature and organism size—a biological law for ec-  
544 totherms? *Adv. Ecol. Res.* 25, 1–58.

- 545 Bell, G., 2010. Fluctuating selection: the perpetual renewal of adapta-  
546 tion in variable environments. *Philos Trans R Soc Lond B Biol Sci* 365,  
547 87–97. doi:10.1098/rstb.2009.0150. bell, Graham eng Review England  
548 2009/12/17 *Philos Trans R Soc Lond B Biol Sci*. 2010 Jan 12;365(1537):87-  
549 97. doi: 10.1098/rstb.2009.0150.
- 550 Bergland, A.O., Behrman, E.L., O'Brien, K.R., Schmidt, P.S., Petrov, D.A.,  
551 2014. Genomic Evidence of Rapid and Stable Adaptive Oscillations over  
552 Seasonal Time Scales in *Drosophila*. *PLoS Genetics* 10, e1004775. doi:10.  
553 1371/journal.pgen.1004775.
- 554 Bitter, M.C., Wong, J.M., Dam, H.G., Donelan, S.C., Kenkel, C.D., Ko-  
555 moroske, L.M., Nickols, K.J., Rivest, E.B., Salinas, S., Burgess, S.C.,  
556 Lotterhos, K.E., 2021. Fluctuating selection and global change: a syn-  
557 thesis and review on disentangling the roles of climate amplitude, pre-  
558 dictability and novelty. *Proceedings. Biological sciences* 288, 20210727.  
559 doi:10.1098/rspb.2021.0727.
- 560 Black, A.R., Dodson, S.I., 2003. Ethanol: a better preservation technique  
561 for *Daphnia*. *Limnology and Oceanography: Methods* 1, 45–50. doi:10.  
562 4319/1om.2003.1.45.
- 563 Bogert, C.M., 1949. Thermoregulation in reptiles, a factor in evolution.  
564 *Evolution* 3. doi:10.2307/2405558.
- 565 Borkman, D.G., Fofonoff, P., Smayda, T.J., Turner, J.T., 2018. Changing  
566 *Acartia* spp. phenology and abundance during a warming period in Narra-

- 567 gansett Bay, Rhode Island, USA: 1972–1990. *Journal of Plankton Research*  
568 40, 580–594. doi:10.1093/plankt/fby029.
- 569 Bradford, J.M., 1976. Partial revision of the *Acartia* subgenus *Acartiura*  
570 (Copepoda: Calanoida: Acartiidae). *New Zealand Journal of Marine and*  
571 *Freshwater Research* 10, 159–202. doi:10.1080/00288330.1976.9515606.
- 572 Brakefield, P.M., 1985. Differential winter mortality and seasonal selec-  
573 tion in the polymorphic ladybird *adalia bipunctata* (l) in the netherlands.  
574 *Biological Journal of the Linnean Society* 24, 189–206. doi:10.1111/j.  
575 1095-8312.1985.tb00169.x.
- 576 Brennan, R.S., deMayo, J.A., Dam, H.G., Finiguerra, M.B., Baumann,  
577 H., Buffalo, V., Pespeni, M.H., 2022b. Experimental evolution reveals  
578 the synergistic genomic mechanisms of adaptation to ocean warming  
579 and acidification in a marine copepod. *Proceedings of the National*  
580 *Academy of Sciences of the United States of America* 119, e2201521119.  
581 doi:10.1073/pnas.2201521119.
- 582 Brown, C.R., Brown, M.B., Roche, E.A., 2013. Fluctuating viability selec-  
583 tion on morphology of cliff swallows is driven by climate. *J Evol Biol* 26,  
584 1129–42. doi:10.1111/jeb.12130. brown, C R Brown, M B Roche, E A  
585 eng R01 AI057569/AI/NIAID NIH HHS/ AI057569/AI/NIAID NIH HHS/  
586 Research Support, N.I.H., Extramural Research Support, Non-U.S. Gov't  
587 Research Support, U.S. Gov't, Non-P.H.S. Switzerland 2013/03/21 *J Evol*  
588 *Biol.* 2013 May;26(5):1129-42. doi: 10.1111/jeb.12130. Epub 2013 Mar 19.
- 589 Brown, J.H., Gillooly, J.F., Allen, A.P., Savage, V.M., West, G.B., 2004.

- 590     Toward a metabolic theory of ecology. *Ecology* 85, 1771–1789. doi:10.  
591     1890/03–9000.
- 592     Bujan, J., Roeder, K.A., Yanoviak, S.P., Kaspari, M., 2020. Seasonal plastic-  
593     ity of thermal tolerance in ants. *Ecology* 101, e03051. doi:10.1002/ecy.  
594     3051.
- 595     Burriss, Z.P., Dam, H.G., 2014. Deleterious effects of the ciliate epibiont  
596     Zoothamnium sp. on fitness of the copepod *Acartia tonsa*. *Journal of*  
597     *Plankton Research* 36, 788–799. doi:10.1093/plankt/fbt137.
- 598     CODONCODE, 2010. CodonCodeAligner. Corporation Software for  
599     DNA Sequencing.. Centerville MA 02632, USA. URL: [https://www.](https://www.codoncode.com/)  
600     [codoncode.com/](https://www.codoncode.com/).
- 601     Connolly, J.K., Watkins, J.M., Hinchey, E.K., Rudstam, L.G., Reid, J.W.,  
602     2017. New cyclopoid copepod (*Thermocyclops crassus*) reported in the  
603     Laurentian Great Lakes. *Journal of Great Lakes Research* 43, 198–203.  
604     doi:10.1016/j.jglr.2017.03.020.
- 605     Cowles, R.B., Bogert, C.M., 1944. A preliminary study of the thermal re-  
606     quirements of desert reptiles. *Bulletin of the AMNH* 83, 261–296.
- 607     Dam, H.G., deMayo, J.A., Park, G., Norton, L., He, X., Finiguerra, M.B.,  
608     Baumann, H., Brennan, R.S., Pespeni, M.H., 2021. Rapid, but limited,  
609     zooplankton adaptation to simultaneous warming and acidification. *Nature*  
610     *Climate Change* 11, 780–786. doi:10.1038/s41558-021-01131-5.
- 611     Deevey, G.B., 1964. Annual Variations in Length of Copepods in the Sargasso

- 612 Sea off Bermuda. *Journal of the Marine Biological Association of the*  
613 *United Kingdom* 44, 589–600. doi:10.1017/S002531540002779X.
- 614 Deevey, G.B., 1966. Seasonal variations in length of copepods in South  
615 Pacific New Zealand waters. *Marine and Freshwater Research* 17, 155.  
616 doi:10.1071/MF9660155.
- 617 deMayo, J., Brennan, R.S., Pespeni, M., Finiguerra, M., Park, G., Norton, L.,  
618 Baumann, H., Dam, H., in press. Simultaneous warming and acidification  
619 limit population fitness and reveal phenotype costs for a marine copepod.  
620 *Proceedings of the Royal Society B* .
- 621 Diekmann, A.B.S., Clemmesen, C., St. John, M.A., Paulsen, M., Peck, M.A.,  
622 2012. Environmental cues and constraints affecting the seasonality of domi-  
623 nant calanoid copepods in brackish, coastal waters: a case study of *Acartia*,  
624 *Temora* and *Eurytemora* species in the south-west Baltic. *Marine Biology*  
625 159, 2399–2414. doi:10.1007/s00227-012-1955-0.
- 626 Dutheil, C., Meier, H.E.M., Gröger, M., Börgel, F., 2022. Understanding  
627 past and future sea surface temperature trends in the Baltic Sea. *Climate*  
628 *Dynamics* 58, 3021–3039. doi:10.1007/s00382-021-06084-1.
- 629 Dzierzbicka-Głowacka, L., Musialik-Koszarowska, M., Kalarus, M.,  
630 Lemieszek, A., Pratkanica, P., Janecki, M., Żmijewska, M.I., 2019. The  
631 Interannual Changes in the Secondary Production and Mortality Rate of  
632 Main Copepod Species in the Gulf of Gdańsk (The Southern Baltic Sea).  
633 *Applied Sciences* 9, 2039. doi:10.3390/app9102039.



- 634 Edgar, R.C., 2004. MUSCLE: multiple sequence alignment with high ac-  
635 curacy and high throughput. *Nucleic acids research* 32, 1792–1797.  
636 doi:10.1093/nar/gkh340.
- 637 Escribano, R., McLaren, I.A., 1992. Influence of food and temperature on  
638 lengths and weights of marine copepods. *Journal of Experimental Marine*  
639 *Biology and Ecology* 159, 77–88. doi:10.1016/0022-0981(92)90259-D.
- 640 Figueroa, N.J., Figueroa, D.F., Hicks, D., 2020. Phylogeography of *Acartia*  
641 *tonsa* Dana, 1849 (Calanoida: Copepoda) and phylogenetic reconstruction  
642 of the genus *Acartia* Dana, 1846. *Marine Biodiversity* 50. doi:10.1007/  
643 s12526-020-01043-1.
- 644 Folmer, O.F., Black, M.B., Hoeh, W.R., Lutz, R.V., Vrijenhoek, R.C., 1994.  
645 DNA primers for amplification of mitochondrial cytochrome c oxidase sub-  
646 unit I from diverse metazoan invertebrates. *Molecular marine biology and*  
647 *biotechnology* 3 5, 294–9.
- 648 Garzke, J., Ismar, S.M.H., Sommer, U., 2015. Climate change affects low  
649 trophic level marine consumers: warming decreases copepod size and abun-  
650 dance. *Oecologia* 177, 849–860. doi:10.1007/s00442-014-3130-4.
- 651 Ghalambor, C.K., Huey, R.B., Martin, P.R., Tewksbury, J.J., Wang, G.,  
652 2006. Are mountain passes higher in the tropics? Janzen’s hypothesis re-  
653 visited. *Integr Comp Biol* 46, 5–17. doi:10.1093/icb/icj003. ghalambor,  
654 Cameron K Huey, Raymond B Martin, Paul R Tewksbury, Joshua J Wang,  
655 George eng England 2006/02/01 *Integr Comp Biol*. 2006 Feb;46(1):5-17.  
656 doi: 10.1093/icb/icj003. Epub 2006 Jan 6.

- 657 González, J.G., 1974. Critical thermal maxima and upper lethal temper-  
658 atures for the calanoid copepods *Acartia tonsa* and *A. clausi*. *Marine*  
659 *Biology* 27, 219–223. doi:10.1007/BF00391947.
- 660 Gunderson, A.R., Stillman, J.H., 2015. Plasticity in thermal tolerance has  
661 limited potential to buffer ectotherms from global warming. *Proc Biol Sci*  
662 282, 20150401. doi:10.1098/rspb.2015.0401. gunderson, Alex R Still-  
663 man, Jonathon H eng Research Support, Non-U.S. Gov't Research Sup-  
664 port, U.S. Gov't, Non-P.H.S. England 2015/05/23 *Proc Biol Sci*. 2015 Jun  
665 7;282(1808):20150401. doi: 10.1098/rspb.2015.0401.
- 666 Hairston, N.G., Dillon, T.A., 1990. Fluctuating selection and response in  
667 a population of freshwater copepods. *Evolution* 44, 1796–1805. doi:10.  
668 1111/j.1558-5646.1990.tb05250.x.
- 669 Healy, T.M., Bock, A.K., Burton, R.S., 2019. Variation in developmental  
670 temperature alters adulthood plasticity of thermal tolerance in *tigriopus*  
671 *californicus*. *The Journal of experimental biology* 222. doi:10.1242/jeb.  
672 213405.
- 673 Holste, L., Peck, M.A., 2006. The effects of temperature and salinity on  
674 egg production and hatching success of Baltic *Acartia tonsa* (Copepoda:  
675 Calanoida): a laboratory investigation. *Marine Biology* 148, 1061–1070.  
676 doi:10.1007/s00227-005-0132-0.
- 677 Hopkin, R.S., Qari, S., Bowler, K., Hyde, D., Cuculescu, M., 2006. Seasonal  
678 thermal tolerance in marine Crustacea. *Journal of Experimental Marine*  
679 *Biology and Ecology* 331, 74–81. doi:10.1016/j.jembe.2005.10.007.

- 680 Horne, C.R., Hirst, A.G., Atkinson, D., Neves, A., Kiørboe, T., 2016. A  
681 global synthesis of seasonal temperature-size responses in copepods. *Global*  
682 *Ecology and Biogeography* 25, 988–999. doi:10.1111/geb.12460.
- 683 Ismar, S.M.H., Hansen, T., Sommer, U., 2008. Effect of food concentration  
684 and type of diet on *Acartia* survival and naupliar development. *Marine*  
685 *Biology* 154, 335–343. doi:10.1007/s00227-008-0928-9.
- 686 Janzen, D.H., 1967. Why mountain passes are higher in the tropics. *The*  
687 *American Naturalist* 101, 233–249. doi:10.1086/282487.
- 688 Johnson, O.L., Tobler, R., Schmidt, J.M., Huber, C.D., 2023. Fluctuat-  
689 ing selection and the determinants of genetic variation. *Trends Genet*  
690 URL: <https://www.ncbi.nlm.nih.gov/pubmed/36890036>, doi:10.1016/  
691 *j.tig.2023.02.004*.
- 692 Karlsson, K., Winder, M., 2020. Adaptation potential of the copepod *Eury-*  
693 *temora affinis* to a future warmer Baltic Sea. *Ecology and evolution* 10,  
694 5135–5151. doi:10.1002/ece3.6267.
- 695 Lehman, J.T., 1988. Ecological principles affecting community structure  
696 and secondary production by zooplankton in marine and freshwater envi-  
697 ronments1. *Limnology and Oceanography* 33, 931–945. doi:10.4319/L0.  
698 1988.33.4PART2.0931.
- 699 Lenth, R.V., 2023. emmeans: Estimated Marginal Means, aka Least-Squares  
700 Means. URL: <https://CRAN.R-project.org/package=emmeans>. r pack-  
701 age version 1.8.4-1.

- 702 Leong, W., Sun, P.Y., Edmands, S., 2017. Latitudinal clines in temper-  
703 ature and salinity tolerance in tidepool copepods. *J Hered* 109, 71–  
704 77. doi:10.1093/jhered/esx061. leong, Wai Sun, Patrick Y Edmands,  
705 Suzanne eng Research Support, Non-U.S. Gov't 2017/10/11 *J Hered.* 2017  
706 Dec 21;109(1):71-77. doi: 10.1093/jhered/esx061.
- 707 Lonsdale, D.J., Levinton, J.S., 1985. Latitudinal Differentiation in Copepod  
708 Growth: An Adaptation to Temperature. *Ecology* 66, 1397–1407. doi:10.  
709 2307/1938002.
- 710 Mahjoub, M.S., Wu, C.H., Leeper, A., Hwang, J.S., Drillet, G., 2014. Pop-  
711 ulation density and mate selection in the copepod *Acartia tonsa*. *Journal*  
712 *of Plankton Research* 36, 872–876. doi:10.1093/plankt/fbu017.
- 713 Möllmann, C., 2002. Population dynamics of calanoid copepods and the  
714 implications of their predation by clupeid fish in the central baltic sea.  
715 *Journal of Plankton Research* 24, 959–978. doi:10.1093/plankt/24.10.  
716 959.
- 717 Niklasson, M., Tomiuk, J., Parker, E.D., 2004. Maintenance of clonal diver-  
718 sity in *dipsa bifurcata* (fallen, 1810) (diptera: Lonchopteridae). i. fluctuat-  
719 ing seasonal selection moulds long-term coexistence. *Heredity (Edinb)* 93,  
720 62–71. doi:10.1038/sj.hdy.6800480.
- 721 Ortega-Mayagoitia, E., Hernández-Martínez, O., Ciro-Pérez, J., 2018. Phe-  
722 notypic plasticity of life-history traits of a calanoid copepod in a tropical  
723 lake: Is the magnitude of thermal plasticity related to thermal variability?  
724 *PloS one* 13, e0196496. doi:10.1371/journal.pone.0196496.

- 725 Paradis, E., Schliep, K., 2019. ape 5.0: an environment for modern phyloge-  
726 netics and evolutionary analyses in R. *Bioinformatics* 35, 526–528.
- 727 Pereira, R.J., Sasaki, M.C., Burton, R.S., 2017. Adaptation to a latitudinal  
728 thermal gradient within a widespread copepod species: the contributions  
729 of genetic divergence and phenotypic plasticity. *Proceedings. Biological*  
730 *sciences* 284. doi:10.1098/rspb.2017.0236.
- 731 R Core Team, 2022. R: A Language and Environment for Statistical Com-  
732 puting. R Foundation for Statistical Computing. Vienna, Austria. URL:  
733 <https://www.R-project.org/>.
- 734 Reusch, T.B.H., 2014. Climate change in the oceans: evolutionary versus  
735 phenotypically plastic responses of marine animals and plants. *Evolution-*  
736 *ary applications* 7, 104–122. doi:10.1111/eva.12109.
- 737 Reusch, T.B.H., Dierking, J., Andersson, H.C., Bonsdorff, E., Carstensen,  
738 J., Casini, M., Czajkowski, M., Hasler, B., Hinsby, K., Hyytiäinen, K.,  
739 Johannesson, K., Jomaa, S., Jormalainen, V., Kuosa, H., Kurland, S.,  
740 Laikre, L., MacKenzie, B.R., Margonski, P., Melzner, F., Oesterwind, D.,  
741 Ojaveer, H., Refsgaard, J.C., Sandström, A., Schwarz, G., Tonderski, K.,  
742 Winder, M., Zandersen, M., 2018. The Baltic Sea as a time machine for the  
743 future coastal ocean. *Science advances* 4, eaar8195. doi:10.1126/sciadv.  
744 aar8195.
- 745 Riccardi, N., Mariotto, L., 2000. Seasonal variations in copepod body length:  
746 a comparison between different species in the Lagoon of Venice. *Aquatic*  
747 *Ecology* 34, 243–252. doi:10.1023/A:1009971507797.

- 748 Rubalcaba, J.G., Olalla-Tárraga, M.Á., 2020. The biogeography of thermal  
749 risk for terrestrial ectotherms: Scaling of thermal tolerance with body size  
750 and latitude. *The Journal of animal ecology* 89, 1277–1285. doi:10.1111/  
751 1365-2656.13181.
- 752 Rubalcaba, J.G., Verberk, W., Hendriks, A.J., Saris, B., Woods, H.A.,  
753 2020. Oxygen limitation may affect the temperature and size dependence  
754 of metabolism in aquatic ectotherms. *Proc Natl Acad Sci U S A* 117,  
755 31963–31968. URL: <https://www.ncbi.nlm.nih.gov/pubmed/33257544>,  
756 doi:10.1073/pnas.2003292117.
- 757 Sasaki, M., Hedberg, S., Richardson, K., Dam, H.G., 2019. Complex in-  
758 teractions between local adaptation, phenotypic plasticity and sex affect  
759 vulnerability to warming in a widespread marine copepod. *Royal Society*  
760 *open science* 6, 182115. doi:10.1098/rsos.182115.
- 761 Sasaki, M.C., Dam, H.G., 2019. Integrating patterns of thermal tolerance and  
762 phenotypic plasticity with population genetics to improve understanding of  
763 vulnerability to warming in a widespread copepod. *Global change biology*  
764 25, 4147–4164. doi:10.1111/gcb.14811.
- 765 Sasaki, M.C., Dam, H.G., 2020. Genetic differentiation underlies seasonal  
766 variation in thermal tolerance, body size, and plasticity in a short-lived  
767 copepod. *Ecology and evolution* 10, 12200–12210. doi:10.1002/ece3.  
768 6851.
- 769 Sasaki, M.C., Dam, H.G., 2021. Negative relationship between thermal toler-  
770 ance and plasticity in tolerance emerges during experimental evolution in a

- 771 widespread marine invertebrate. *Evolutionary applications* 14, 2114–2123.  
772 doi:10.1111/eva.13270.
- 773 Schneider, C.A., Rasband, W.S., Eliceiri, K.W., 2012. NIH Image to ImageJ:  
774 25 years of image analysis. *Nature methods* 9, 671–675. doi:10.1038/  
775 nmeth.2089.
- 776 Seuront, L., 2005. First record of the calanoid copepod *Acartia omorii* (Cope-  
777 poda: Calanoida: Acartiidae) in the southern bight of the North Sea. *Jour-  
778 nal of Plankton Research* 27, 1301–1306. doi:10.1093/plankt/fbi088.
- 779 Siepielski, A.M., DiBattista, J.D., Carlson, S.M., 2009. It's about time:  
780 the temporal dynamics of phenotypic selection in the wild. *Ecol Lett*  
781 12, 1261–76. doi:10.1111/j.1461-0248.2009.01381.x. siepielski, Adam  
782 M DiBattista, Joseph D Carlson, Stephanie M eng Research Support,  
783 Non-U.S. Gov't Research Support, U.S. Gov't, Non-P.H.S. Review Eng-  
784 land 2009/09/11 *Ecol Lett*. 2009 Nov;12(11):1261-76. doi: 10.1111/j.1461-  
785 0248.2009.01381.x. Epub 2009 Sep 8.
- 786 Sommer, U., Sommer, F., Santer, B., Zöllner, E., Jürgens, K., Jamieson,  
787 C., Boersma, M., Gocke, K., 2003. *Daphnia* versus copepod impact on  
788 summer phytoplankton: functional compensation at both trophic levels.  
789 *Oecologia* 135, 639–647. doi:10.1007/s00442-003-1214-7.
- 790 Sullivan, B.K., McManus, L.T., 1986. Factors controlling seasonal succes-  
791 sion of the copepods *Acartia hudsonica* and *A. tonsa* in Narragansett Bay,  
792 Rhode Island: temperature and resting egg production. *Marine Ecology*  
793 *Progress Series* 28, 121–128. doi:10.3354/meps028121.

- 794 Sunar, C.S., Kir, M., 2021. Thermal tolerance of *Acartia tonsa*: In relation  
795 to acclimation temperature and life stage. *Journal of thermal biology* 102,  
796 103116. doi:10.1016/j.jtherbio.2021.103116.
- 797 Szymczycha, B., Zaborska, A., Bełdowski, J., Kuliński, K., Beszczyńska-  
798 Möller, A., Kędra, M., Pempkowiak, J., 2019. The Baltic Sea, in: *World*  
799 *Seas: an Environmental Evaluation*. Elsevier, pp. 85–111. doi:10.1016/  
800 B978-0-12-805068-2.00005-X.
- 801 Turner, J.T., 2004. The importance of small planktonic copepods and their  
802 roles in pelagic marine food webs. *Zoological Studies* 43, 255–266.
- 803 Ueda, H., 1986. Redescription of the planktonic calanoid copepod *Acartia*  
804 *hudsonica* from Atlantic and Pacific waters: A new record from Japanese  
805 waters. *Journal of the Oceanographical Society of Japan* 42, 124–133.  
806 doi:10.1007/BF02109099.
- 807 Ueda, H., 1987. Temporal and spatial distribution of the two closely related  
808 *Acartia* species *A. omorii* and *A. hudsonica* (Copepoda, Calanoida) in a  
809 small inlet water of Japan. *Estuarine, Coastal and Shelf Science* 24, 691–  
810 700. doi:10.1016/0272-7714(87)90107-7.
- 811 Vavrek, M.C., McGraw, J.B., Yang, H.S., 1996. Within-population variation  
812 in demography of *taraxacum officinale*: Maintenance of genetic diversity.  
813 *Ecology* 77, 2098–2107. doi:10.2307/2265704.
- 814 Vidal, J., 1980. Physioecology of zooplankton. I. Effects of phytoplankton  
815 concentration, temperature, and body size on the growth rate of *Calanus*



816 pacificus and Pseudocalanus sp. *Marine Biology* 56, 111–134. doi:10.1007/  
817 BF00397129.

818 Viitasalo, M., Koski, M., Pellikka, K., Johansson, S., 1995. Seasonal and long-  
819 term variations in the body size of planktonic copepods in the northern  
820 Baltic Sea. *Marine Biology* 123, 241–250. doi:10.1007/BF00353615.

821 de Villemereuil, P., Charmantier, A., Arlt, D., Bize, P., Brekke, P., Brouwer,  
822 L., Cockburn, A., Cote, S.D., Dobson, F.S., Evans, S.R., Festa-Bianchet,  
823 M., Gamelon, M., Hamel, S., Hegelbach, J., Jerstad, K., Kempnaers,  
824 B., Kruuk, L.E.B., Kumpula, J., Kvalnes, T., McAdam, A.G., McFar-  
825 lane, S.E., Morrissey, M.B., Part, T., Pemberton, J.M., Qvarnstrom, A.,  
826 Rostad, O.W., Schroeder, J., Senar, J.C., Sheldon, B.C., van de Pol, M.,  
827 Visser, M.E., Wheelwright, N.T., Tufto, J., Chevin, L.M., 2020. Fluc-  
828 tuating optimum and temporally variable selection on breeding date in  
829 birds and mammals. *Proc Natl Acad Sci U S A* 117, 31969–31978. URL:  
830 <https://www.ncbi.nlm.nih.gov/pubmed/33257553>, doi:10.1073/pnas.  
831 2009003117.

832 Visse, M., 2007. Detrimental effect of peritrich ciliates (*Epistylis* sp.) as  
833 epibionts on the survival of the copepod *Acartia biflosa*. *Sci. Biol. Ecol*  
834 56, 173–178.

835 Walter, T.C., Boxshall, G.A., 2023. World of Copepods Database. *Acar-*  
836 *tia Dana*, 1846: Accessed through: World Register of Marine Species.  
837 URL: [https://www.marinespecies.org/aphia.php?p=taxdetails&id=](https://www.marinespecies.org/aphia.php?p=taxdetails&id=104108on2023-01-16)  
838 [104108on2023-01-16](https://www.marinespecies.org/aphia.php?p=taxdetails&id=104108on2023-01-16).

839 Yu, G., Smith, D.K., Zhu, H., Guan, Y., Lam, T.T.Y., 2017. ggtree : an R  
840 package for visualization and annotation of phylogenetic trees with their  
841 covariates and other associated data. *Methods in Ecology and Evolution*  
842 8, 28–36. doi:10.1111/2041-210X.12628.

Table 1: Overview over sampling dates and corresponding SST average.

| <b>Collection name</b> | <b>Collection date</b> | <b>Daily mean</b>   | <b>2-week mean</b>  |
|------------------------|------------------------|---------------------|---------------------|
| Collection 1           | 06 Apr 2022            | 5.81 $\pm$ 0.05 °C  | 6.36 $\pm$ 0.47 °C  |
| Collection 2           | 16 May 2022            | 12.66 $\pm$ 0.53 °C | 11.44 $\pm$ 0.84 °C |
| Collection 3           | 13 Jun 2022            | 12.37 $\pm$ 0.33 °C | 12.86 $\pm$ 1.52 °C |
| Collection 4           | 27 Jun 2022            | 18.35 $\pm$ 0.13 °C | 16.55 $\pm$ 1.83 °C |
| Collection 5           | 19 Jul 2022            | 19.16 $\pm$ 0.79 °C | 18.11 $\pm$ 0.68 °C |

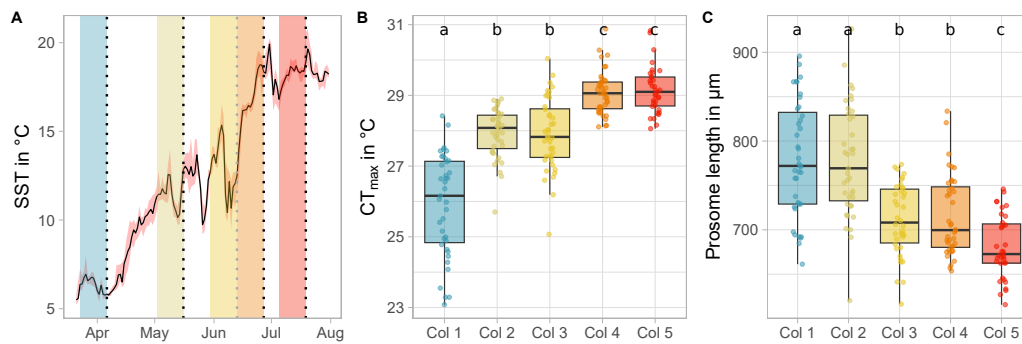

Figure 1: Thermal tolerance follows the seasonal changes in temperature. (A) Sea surface temperature at the collection site where sampling points are indicated by dotted lines and shaded boxes indicate the two-week period prior to sampling. (B) Critical thermal maxima and (C) mean prosome length for wild collected individuals. Boxplot colors correspond to sampling date and compact letters show the results from post-hoc tests where shared letters indicate no significant difference between measurements.

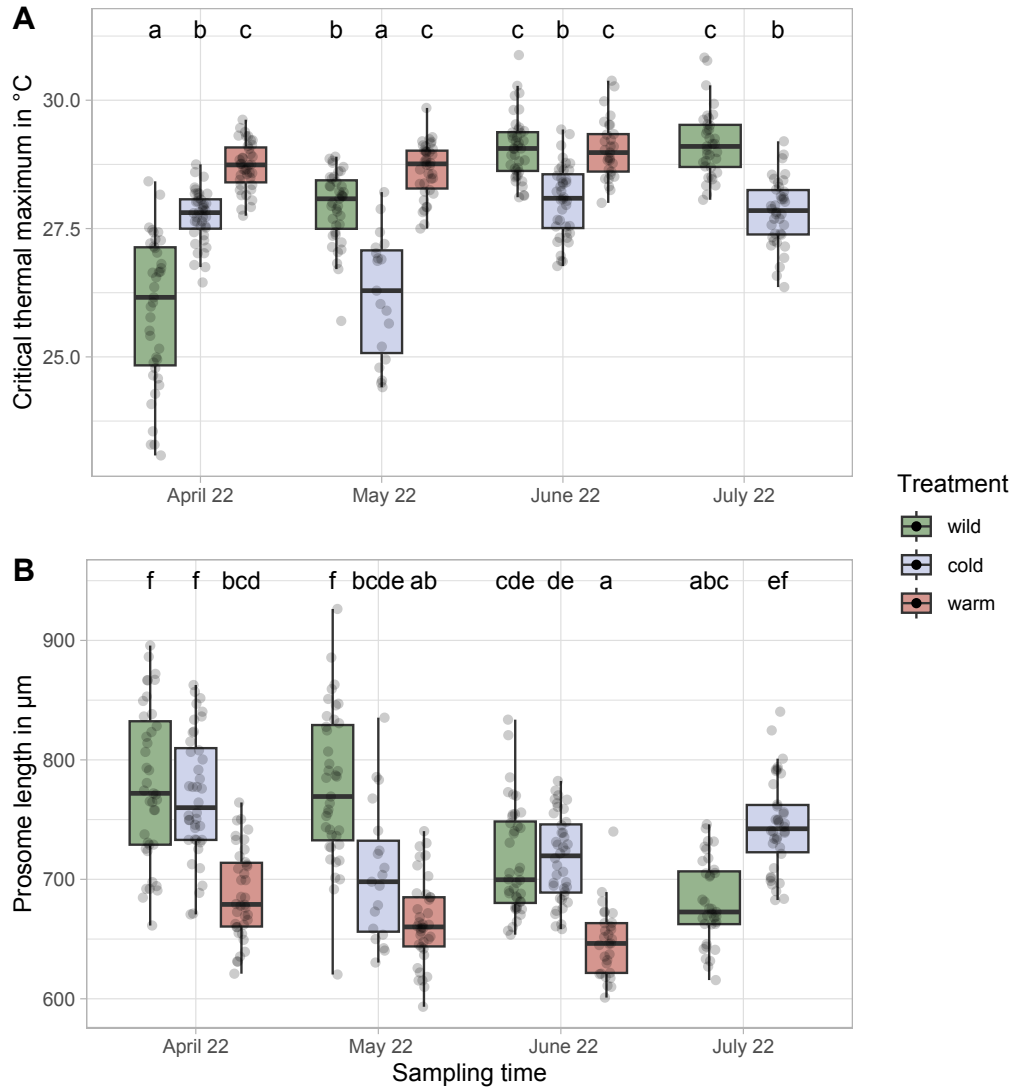

Figure 2: Phenotyping results following common garden for (A) critical thermal maxima and (B) prosome length. Colors of boxes correspond to treatment where "wild" are field collected animals, "cold" are F1 animals at 11°C, "warm" are F1 animals at 18°C. Compact letters show the results from post-hoc tests where shared letters indicate no significant difference between measurements.

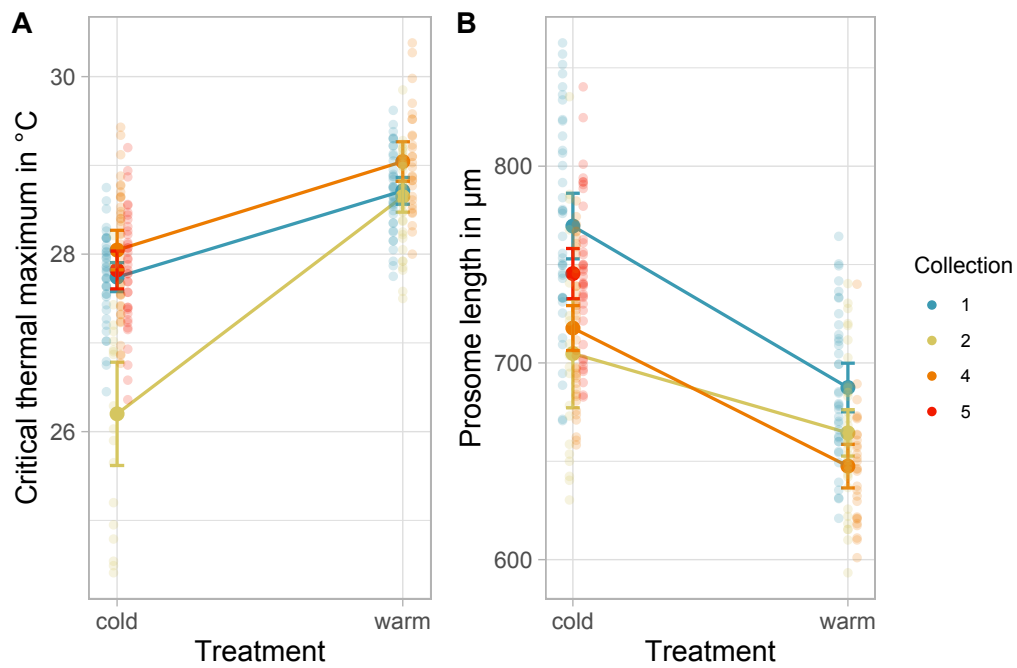

Figure 3: Reaction norms for treatment effect on (A) Critical thermal maximum; (B) Prosome length; bold points indicate mean values, error bars indicate 0.95 % confidence interval.

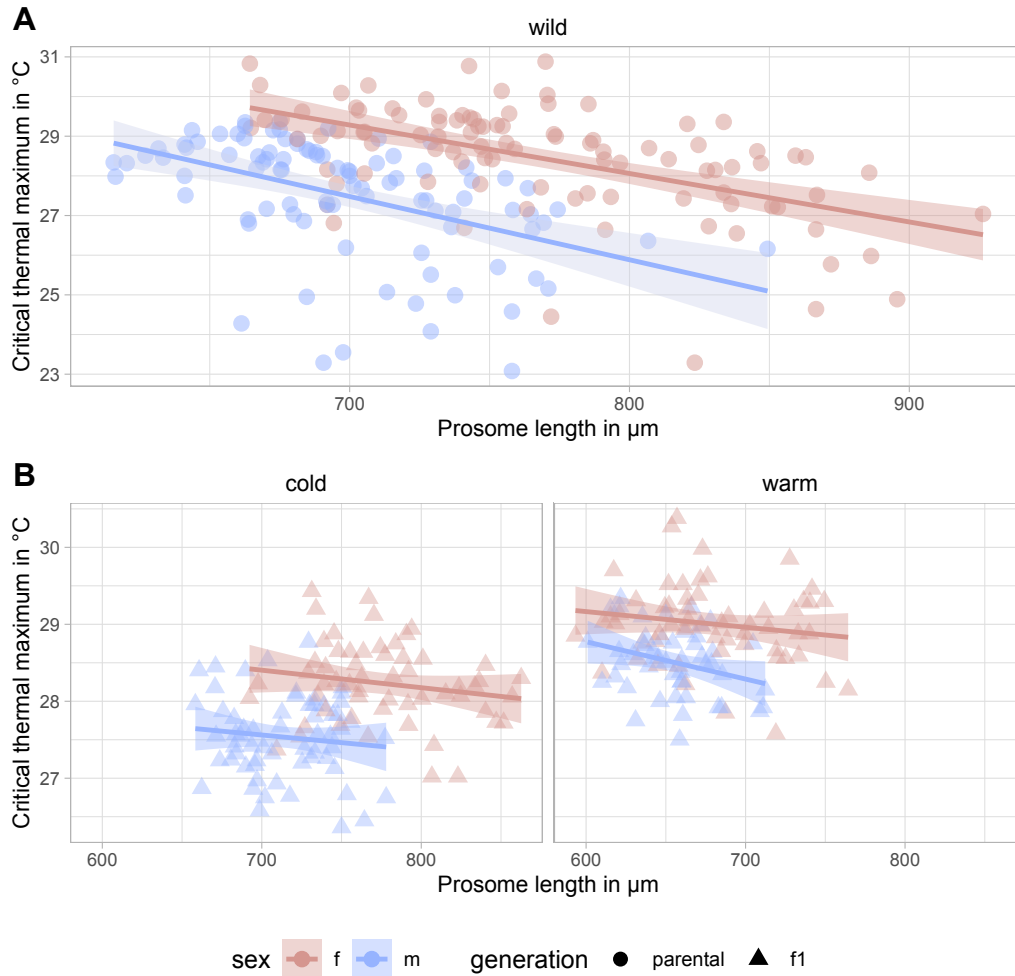

Figure 4: Correlation between prosome length and  $CT_{max}$  in *A. hudsonica*, (A) Parental generation, length has a significant effect on  $CT_{max}$  ( $p < 0.001$ ,  $R^2 = 0.35$ ) (B) F1 generation; cold treatment: no significant effect of length on  $CT_{max}$  ( $p = 0.108$ ,  $R^2 = 0.323$ ); warm treatment: a significant effect of length on  $CT_{max}$  ( $p = 0.038$ ,  $R^2 = 0.242$ ). Linear regression per sex with 95% confidence interval.
